# Supplementary material
Source: ML conference proceedings conference paper supplement (https://proceedings.neurips.cc/paper_files/paper/2020/hash/a09e75c5c86a7bf6582d2b4d75aad615-Abstract.html)

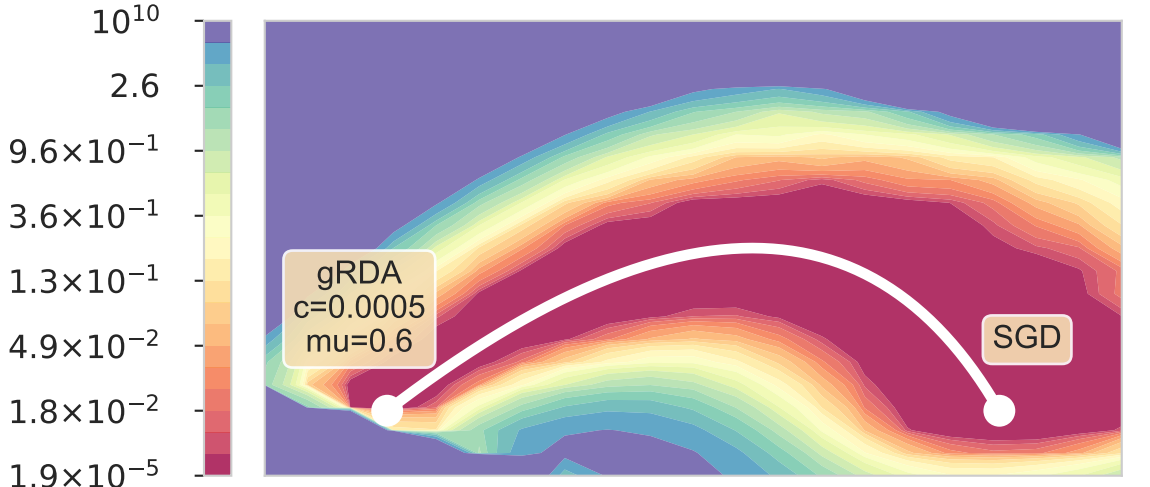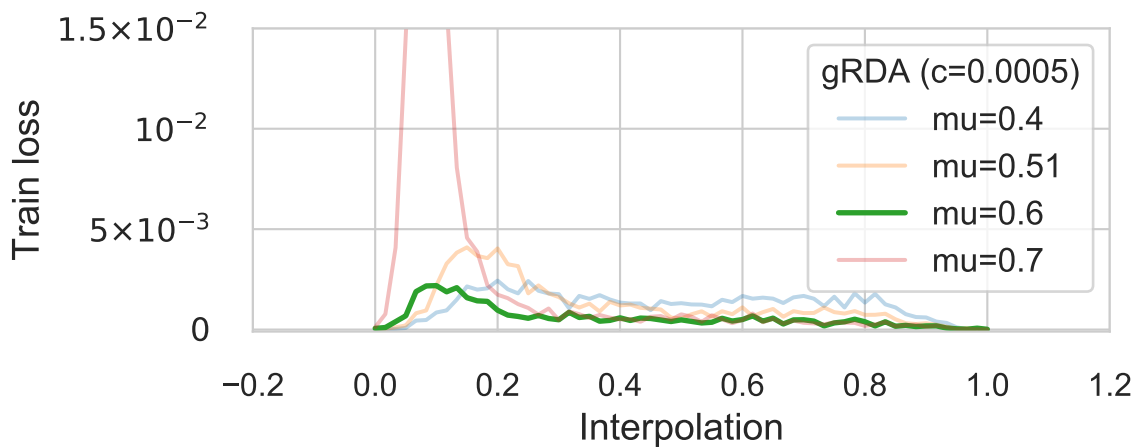

Supplement: Supplementary file [file a09e75c5c86a7bf6582d2b4d75aad615-Supplemental.zip]
